# Supplementary material for: Quantitative Trait Locus Analysis for Deep-Sowing Germination Ability in the Maize IBM Syn10 DH Population
Source: Front Plant Sci. 2017 May 22;8:813. doi: 10.3389/fpls.2017.00813 (PMC5439002; doi:10.3389/fpls.2017.00813)
Supplement: Supplementary Table 3 — Twenty two overlapping QTL and their clusters for different germination-related traits in Tables 3, 4. [file Table3.xlsx]

## Sheet: cluster
Supplementary Table 3 Twenty two overlapping QTL and their clusters for different germination-related traits in Table 3 and 4
Cluster	QTL Symbol	Chromosome	Position (cM)	Peak marker	LOD a	R2 b	Additive effect c	PC d start(Mb)	PC end(Mb)	GC e start(cM)	GC end(cM)
Cluster 1	qDSGR1-1	1	1183.55	chr01.2532.5	2.72	3.32	-5.5215	251.875	257.8	1167.45	1210.7
	qSGSL1-1	1	1188.55	chr01.2533.5	2.677	2.78	-0.3845	252.95	258.05	1172.8	1220.1
Cluster 2	qSGCL1-2	1	1582.8	chr01.2935.5	2.8485	2.91	-0.1273	292.725	295.8	1558.85	1605.8
	qSGSL1-2	1	1589.65	chr01.2951.5	3.2601	3.43	-0.4313	293.5	295.8	1575.3	1605.8
Cluster 3	qDSML2-2	2	911.95	chr02.2043.5	3.5465	4.34	-0.318	203.05	205.6	891.45	936.4
	qDSGR2-1	2	932.45	chr02.2055.5	5.0885	6.33	-8.0523	205.2	205.9	921.95	943.9
	qDSSL2-1	2	932.45	chr02.2055.5	3.213	3.87	-0.431	203.6	205.9	905.1	943.9
Cluster 4	qSGML3-1	3	754.45	chr03.1810.5	4.3521	4.72	0.2847	180.2	182.575	743.7	771.6
	qDSCL3-1	3	771.6	chr03.1827.5	2.535	3.21	0.1016	180.95	185.25	751.95	805.25
	qDSPL3-1	3	818.45	chr03.1873.5	6.4246	7.55	0.3874	184.6	188.7	802.35	829.9
	qSGSL3-1	3	824.15	chr03.1884.5	3.725	4.09	0.4698	187.2	191.325	816.3	841.7
Cluster 5	qSGML4-1	4	170.05	chr04.61.5	3.4286	3.64	-0.2482	5.2	7.8	136.8	196.5
	qSGCL4-1	4	171.1	chr04.63	4.1843	4.32	-0.1561	5.875	7.2	152	190.4
	qSGSL4-1	4	171.1	chr04.63	3.4949	3.68	-0.4492	5.875	7.4	154.5	193.3
	qDSGR4-2	4	193.3	chr04.74.5	2.5805	3.19	-5.451	5.875	9.7	157	212.25
Cluster 6	qSGML4-3	4	614.1	chr04.1595.5	2.8389	2.97	0.2408	157.25	167.6	602.65	654.85
	qDSSL4-2	4	626.6	chr04.1623.5	2.6665	3.2	0.3926	158.1	165.475	609.45	636.25
Cluster 7	qSGSL5-1	5	439.7	chr05.403.5	3.9294	4.16	0.5079	39.5	48.05	433.65	449
	qSGCL5-1	5	445.8	chr05.443	2.8499	3.01	0.1321	39.5	52.875	433.65	457.2
Cluster 8	qSGML6-1	6	221.6	chr06.925.5	3.4626	3.64	-0.2488	90.725	93.15	210.9	239.15
	qSGCL6-1	6	229.15	chr06.932.5	3.8179	3.93	-0.1454	91.9	93.15	217.7	239.15
	qSGPL6-1	6	229.15	chr06.932.5	4.7327	5	-0.3909	92.95	93.15	223.4	236.65
Cluster 9	qDSSL7-1	7	423.25	chr07.1279.5	3.231	3.88	-0.4226	125.55	130.5	406	444.3
	qDSML7-1	7	423.6	chr07.1280.5	2.8469	3.47	-0.2899	125.55	129.8	408.5	432.5
Cluster 10	qDSCL9-1	9	142.25	chr09.81.5	2.8391	3.55	0.109	7.8	8.4	125.4	156.95
	qSGCL9-1	9	181.15	chr09.95.5	2.6518	2.8	-0.1235	8.3	13.4	151.6	247
	qSGPL9-1	9	181.15	chr09.95.5	3.4746	3.52	-0.2689	8.5	11.1	164.35	210.55
	qDSPL9-3	9	221.6	chr09.116.5	4.2874	4.89	0.3136	10.975	12.8	206.55	230.2
Cluster 11	qDSPL10-1	10	301.1	chr10.1044.5	6.6488	7.8	0.3969	94	111.3	297.55	309.7
	qSGML10-1	10	304.7	chr10.1096.5	4.6555	4.92	0.2857	97.15	116.7	298.25	321.1
	qSGSL10-1	10	304.7	chr10.1096.5	7.1348	7.73	0.6672	90.9	110.125	294.7	307.2
	qSGCL10-1	10	312.9	chr10.1131.5	5.3202	5.55	0.1793	111.3	115.075	309.7	317.55
	a DSGR, DSML, DSCL, DSPL, DSSL represents germination rate, mesocotyl length, coleoptile length, plumule length and seedling length under deep-sowing condition (12.5 cm), respectively; SGGR, SGML, SGCL, SGPL, SGSL represents germination rate, mesocotyl length, coleoptile length, plumule length and seedling length under standard-germination condition (2 cm), respectively.
	b LOD: Log10-likelihood value.
	c R2: The coefficient of determination, which represents the percentage of phenotypic variance explained by a putative QTL.
	d Additive effect: The negative value of additive effect indicates the allele from B73 is positive.
	e PC: Physical coordinate
	f GC: Genetic coordinate.
